# Supplementary material for: Analysis of the Regulatory Science Applied to a Single Portfolio of Eight Biosimilar Product Approvals by Four Key Regulatory Authorities
Source: MDPI journal article supplement (doi:10.3390/ph14040306), 2021-04-01
Supplement: s1 [file s1]

## **Supplementary Materials**

# **Analysis of the Regulatory Science Applied to a Single Portfolio of Eight Biosimilar Product Approvals by Four Key Regulatory Authorities**

**Beverly Ingram <sup>1,\*</sup>, Rebecca S. Lumsden <sup>2</sup>, Adriana Radosavljevic <sup>1</sup> and Christine Kobryn <sup>3</sup>**

<sup>1</sup> Pfizer Inc, Andover, MA 01810, USA; [adriana.radosavljevic@gmail.com](mailto:adriana.radosavljevic@gmail.com)

<sup>2</sup> Pfizer Inc, Walton Oaks, Surrey KT20 7NS, UK; [rebecca.s.lumsden@pfizer.com](mailto:rebecca.s.lumsden@pfizer.com)

<sup>3</sup> Pfizer Inc, Groton, CT 06340, USA; [christine.kobryn@pfizer.com](mailto:christine.kobryn@pfizer.com)

\* Correspondence: [bev.ingram@pfizer.com](mailto:bev.ingram@pfizer.com); Tel.: +1-978-247-4558

**Supplementary Figure S1.** Sub-classification of Labeling and Monograph Queries for HC ( $n = 235$ ).

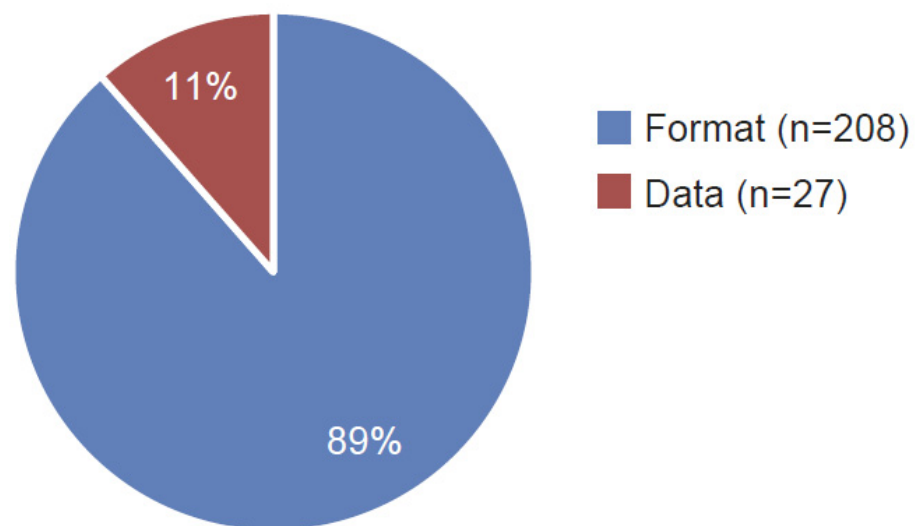

**Abbreviations:** HC, Health Canada.

**Supplementary Figure S2.** Major Classification Queries (A) and Sub-classification of Regulatory (Including Labeling) and Clinical Queries (B) by Molecular Complexity (MAb [ $n = 2811$ ];<sup>a</sup> protein [ $n = 625$ ]<sup>b</sup>) for all RAs

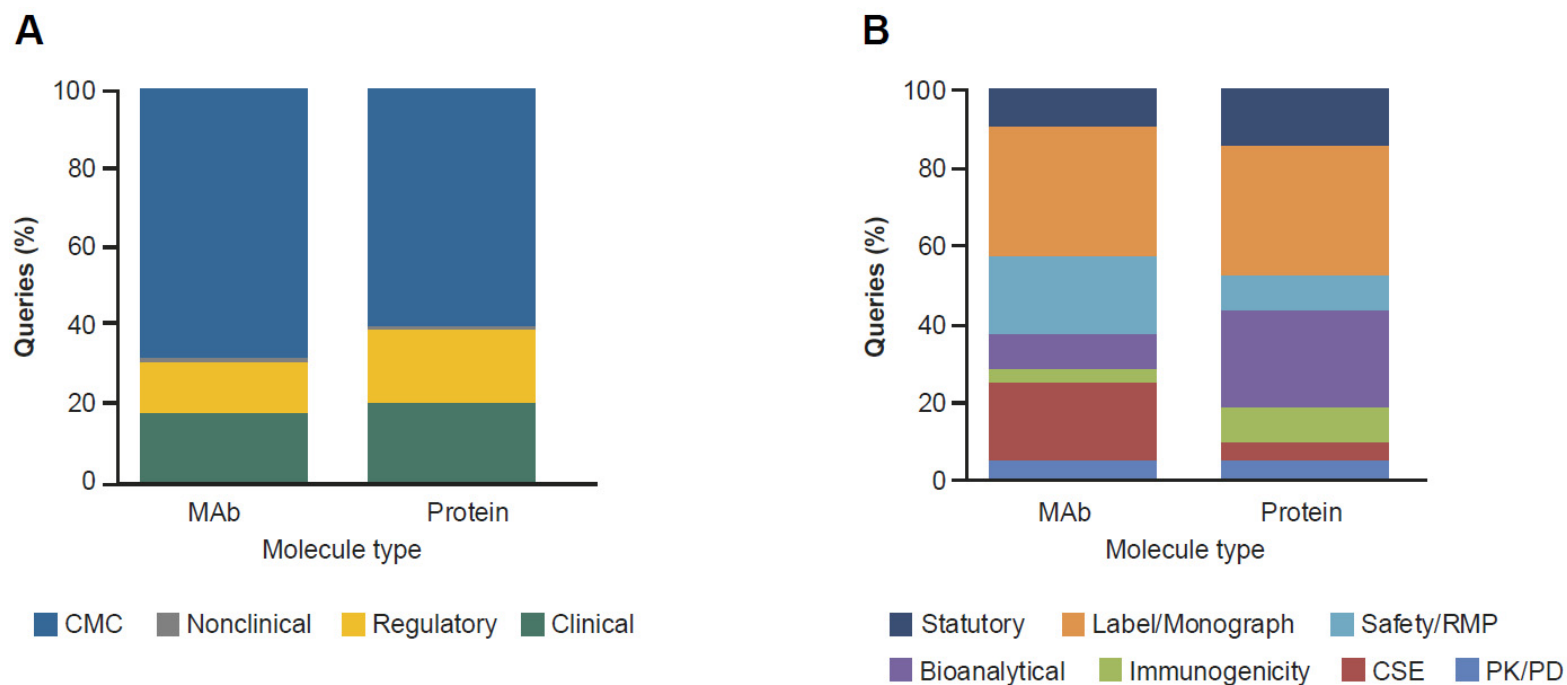

**Abbreviations:** CMC, Chemistry, Manufacturing and Controls; CSE, comparative safety and efficacy; MAb, monoclonal antibody; PK, pharmacokinetic; RA, regulatory authority; RMP, risk-management plan.

<sup>a</sup> PF-adalimumab, PF-bevacizumab, PF-infliximab, PF-rituximab, PF-trastuzumab; <sup>b</sup> PF-epoetin, PF-filgrastim, PF-pegfilgrastim.

**Supplementary Table S1.** Relationship of therapy area and molecular complexity with major classification, and clinical and regulatory sub-classification.

| Variable       |                    | Clinical | Regulatory | Nonclinical | CMC  |  |  |  | n    | $\chi^2$ (df) | p-value |
|----------------|--------------------|----------|------------|-------------|------|--|--|--|------|---------------|---------|
| Therapy area   | Inflammation (n=8) | 37       | 33         | 1           | 475  |  |  |  | 1623 | 1.12 (3)      | .78     |
|                | Oncology (n=17)    | 124      | 83         | 2           | 868  |  |  |  |      |               |         |
| Molecular type | MAB (n=16)         | 507      | 377        | 3           | 1924 |  |  |  | 3436 | 2.14 (3)      | .54     |
|                | Protein (n=5)      | 128      | 116        | 1           | 380  |  |  |  |      |               |         |

| Variable       |                    | PK/PD | CSE | Immunogenicity | Bioanalytical | Safety/<br>RMP | Label/<br>Monograph | Statutory | n    | $\chi^2$ (df) | p-value |
|----------------|--------------------|-------|-----|----------------|---------------|----------------|---------------------|-----------|------|---------------|---------|
| Therapy area   | Inflammation (n=8) | 2     | 13  | 4              | 15            | 3              | 24                  | 9         | 277  | 0.31 (6)      | 1.0     |
|                | Oncology (n=17)    | 6     | 43  | 15             | 55            | 5              | 52                  | 31        |      |               |         |
| Molecular type | MAB (n=16)         | 43    | 175 | 33             | 76            | 180            | 294                 | 83        | 1128 | 12.62 (6)     | .049    |
|                | Protein (n=5)      | 12    | 12  | 21             | 61            | 22             | 80                  | 36        |      |               |         |

**Abbreviations:** CMC, Chemistry, Manufacturing and Controls; CSE, comparative safety and efficacy; df, degrees of freedom; MAB, monoclonal antibody; PD, pharmacodynamics; PK, pharmacokinetic; RA, regulatory authority; RMP, risk-management plan.
